# Supplementary material for: Integrative analysis of long non-coding RNA and messenger RNA expression in toll-like receptor 4-primed mesenchymal stem cells of ankylosing spondylitis
Source: PubMed Central journal article supplement — Ann Transl Med. 2021 Oct;9(20):1563. doi: 10.21037/atm-21-5020 (PMC8576702; doi:10.21037/atm-21-5020), 2021-10
Supplement: atm-09-20-1563-dss.pdf [file atm-09-20-1563-dss.pdf]

## Data Sharing Statement

|                     |                                                                                                                                                     |                                                                                                       |
|---------------------|-----------------------------------------------------------------------------------------------------------------------------------------------------|-------------------------------------------------------------------------------------------------------|
| <b>Article Info</b> | https://dx.doi.org/10.21037/atm-21-5020                                                                                                             |                                                                                                       |
| <b>Item</b>         | <b>Question</b>                                                                                                                                     | <b>Authors' Response<br/>(place "-" if not applicable)</b>                                            |
| 1                   | Would you like to share data collected for your study to others?                                                                                    | YES                                                                                                   |
| 2                   | If not, would you like to share the reason for your decision?                                                                                       | -                                                                                                     |
| 3                   | What data in particular will be shared?                                                                                                             | The data used in bioinformatics analysis and analysis results will be shared                          |
| 4                   | Any other documents will be shared? Such as study protocol, statistical analysis plan, informed consent form, clinical study report, analytic code. | Statistical analysis plan will also be shared if requested.                                           |
| 5                   | When will data availability begin?                                                                                                                  | From the publication date.                                                                            |
| 6                   | When will data availability end?                                                                                                                    | Two years within the publication date, since the technique or survival date may be updated over time. |
| 7                   | To whom will you share the data?                                                                                                                    | Physicians and medical researchers who are interested in studies of postmenopausal osteoporosis.      |
| 8                   | For what type of analysis or purpose?                                                                                                               | For analysis the pathological mechanism of postmenopausal osteoporosis.                               |
| 9                   | How or where can the data/documents be obtained?                                                                                                    | Emails could be sent to the address below to obtain the shared data:<br>liy73@mail.sysu.edu.cn.       |
| 10                  | Any other restrictions?                                                                                                                             | No.                                                                                                   |
