# Supplementary material for: Integrative analysis of long non-coding RNA and messenger RNA expression in toll-like receptor 4-primed mesenchymal stem cells of ankylosing spondylitis
Source: PubMed Central journal article supplement — Ann Transl Med. 2021 Oct;9(20):1563. doi: 10.21037/atm-21-5020 (PMC8576702; doi:10.21037/atm-21-5020), 2021-10
Supplement: atm-09-20-1563-supplementary.pdf [file atm-09-20-1563-supplementary.pdf]

**Table S1** Primers of the analyzed genes

| Gene name                      | Forward primer          | Reverse primer           |
|--------------------------------|-------------------------|--------------------------|
| <i>GAPDH</i>                   | AAGGTGAAGGTCGGAGTCAA    | AATGAAGGGGTCATTGATGG     |
| <i>MIR3142HG</i>               | TGGCTCAGAACTCCGATT      | CCTACTCCTCACAGATACAC     |
| <i>LOC105374444</i>            | AGCCCTCTTTGGTCAACTCC    | TGGTTGCAGCATTGTCTTGG     |
| <i>LOC105371619</i>            | ATGTCTGTAGCATGCGGCTT    | TTTCAGAAAACAGGCCCCG      |
| <i>PACERR</i>                  | CCGTGTCTGGTCTGTACGTC    | AACCTTACTCGCCCCAGTCT     |
| <i>LOC105375914</i>            | ACGCAAGCTGGGTTATTGGA    | AGCAACTGTGGTTGTAGAT      |
| <i>CXCL1</i>                   | CTCTTCTCCCTAGGAGCGTC    | GATGCAGGATTGAGGCAAGC     |
| <i>CXCL8</i>                   | ACTGAGAGTGATTGAGAGTGGAC | AACCCTCTGCACCCAGTTTTTC   |
| <i>CXCL10</i>                  | GTGGCATTCAAGGAGTACCTC   | TGATGGCCTTCGATTCTGGATT   |
| <i>CXCL11</i>                  | GACGCTGTCTTTGCATAGGC    | GGATTTAGGCATCGTTGTCCTTT  |
| <i>CCL20</i>                   | TGCTGTACCAAGAGTTTGCTC   | CGCACACAGACAACCTTTTTCTTT |
| <i>TNF-<math>\alpha</math></i> | CCTCTCTCTAATCAGCCCTCTG  | GAGGACCTGGGAGTAGATGAG    |
| <i>CXCL9</i>                   | TGAGAAAGGGTCGCTGTTCC    | GGGCTTGGGGCAAATTGTTT     |
| <i>PDL1</i>                    | GCTGCACTAATTGTCTATTGGGA | AATTCGCTTGTAGTCGGCACC    |
| <i>IL-1<math>\beta</math></i>  | ATGATGGCTTATTACAGTGGCAA | GTCGGAGATTTCGTAGCTGGA    |
| <i>IL-6</i>                    | ACTCACCTCTTCAGAACGAATTG | CCATCTTTGGAAGTTTCAGGTTG  |
| <i>INOS</i>                    | TTCAGTATCACAACCTCAGCAAG | TGGACCTGCAAGTTAAAATCCC   |

**Table S2** GO analysis of DE mRNA

| ID         | Term                                              | Category           | Count | Fold enrichment | P value  |
|------------|---------------------------------------------------|--------------------|-------|-----------------|----------|
| GO:0051607 | Defense response to virus                         | Biological process | 47    | 10.03           | 4.03E-34 |
| GO:0060337 | Type I interferon signaling pathway               | Biological process | 26    | 13.95           | 1.30E-23 |
| GO:0060333 | Interferon-gamma-mediated signaling pathway       | Biological process | 26    | 12.58           | 3.15E-22 |
| GO:0006954 | Inflammatory response                             | Biological process | 52    | 4.81            | 2.45E-21 |
| GO:0009615 | Response to virus                                 | Biological process | 26    | 8.35            | 3.55E-17 |
| GO:0045071 | Negative regulation of viral genome replication   | Biological process | 16    | 14.09           | 4.25E-15 |
| GO:0051092 | Positive regulation of NF- $\kappa$ B TF activity | Biological process | 26    | 6.77            | 8.34E-15 |
| GO:0006955 | Immune response                                   | Biological process | 37    | 3.73            | 5.49E-12 |
| GO:0032496 | Response to LPS                                   | Biological process | 24    | 5.12            | 4.75E-11 |
| GO:0070098 | Chemokine-mediated signaling pathway              | Biological process | 16    | 7.97            | 9.63E-11 |
| GO:0008009 | Chemokine activity                                | Molecular function | 16    | 11.24           | 2.64E-13 |
| GO:0045236 | CXCR chemokine receptor binding                   | Molecular function | 5     | 18.73           | 2.57E-06 |
| GO:0004842 | Ubiquitin-protein transferase activity            | Molecular function | 26    | 2.74            | 3.57E-06 |
| GO:0003725 | Double-stranded RNA binding                       | Molecular function | 10    | 5.72            | 8.18E-06 |
| GO:0003700 | TF activity, sequence-specific DNA binding        | Molecular function | 47    | 1.85            | 3.69E-05 |
| GO:0016874 | Ligase activity                                   | Molecular function | 19    | 2.81            | 5.17E-05 |
| GO:0005125 | Cytokine activity                                 | Molecular function | 16    | 3.10            | 6.26E-05 |
| GO:0004871 | Signal transducer activity                        | Molecular function | 17    | 2.95            | 6.83E-05 |
| GO:0008270 | Zinc ion binding                                  | Molecular function | 57    | 1.69            | 7.09E-05 |
| GO:0003950 | NAD <sup>+</sup> ADP-ribosyltransferase activity  | Molecular function | 6     | 7.49            | 1.15E-04 |
| GO:0005737 | Cytoplasm                                         | Cellular component | 189   | 1.37            | 2.51E-07 |
| GO:0005829 | Cytosol                                           | Cellular component | 136   | 1.50            | 2.92E-07 |
| GO:0005615 | Extracellular space                               | Cellular component | 65    | 1.79            | 2.98E-06 |
| GO:0005634 | Nucleus                                           | Cellular component | 186   | 1.30            | 1.38E-05 |
| GO:0005576 | Extracellular region                              | Cellular component | 66    | 1.61            | 7.97E-05 |
| GO:0043657 | Host cell                                         | Cellular component | 3     | 21.58           | 2.05E-04 |
| GO:0033256 | I- $\kappa$ B/NF- $\kappa$ B complex              | Cellular component | 3     | 21.58           | 2.05E-04 |
| GO:0097342 | Ripoptosome                                       | Cellular component | 3     | 15.41           | 6.88E-04 |
| GO:0031264 | Death-inducing signaling complex                  | Cellular component | 3     | 15.41           | 6.88E-04 |
| GO:0000932 | Cytoplasmic mRNA processing body                  | Cellular component | 8     | 3.74            | 1.32E-03 |

GO, gene ontology; DE, differentially-expressed; mRNAs, messenger RNAs; TF, transcription factor; LPS, lipopolysaccharide.

**Table S3** Pathways with the largest significant difference of mRNA in KEGG analysis

| ID       | Pathway                                | Count | Fold enrichment | P value  | Gene                                                                                                                                                                                                                                                                 |
|----------|----------------------------------------|-------|-----------------|----------|----------------------------------------------------------------------------------------------------------------------------------------------------------------------------------------------------------------------------------------------------------------------|
| hsa04621 | NLR signaling pathway                  | 38    | 6.67            | 1.39E-21 | <i>CXCL8, GBP3, NAMPT, RBCK1, CXCL2, GBP4, OAS1, MAPK8, GBP2, GBP1, TICAM1, AIM2, GBP5, IFNAR2, TNFAIP3, BIRC3, IL1B, CXCL1, RIPK2, BIRC2, IRF9, MYD88, NLRP3, OAS2, IL6, RIPK1, NFKB1, PANX1, CCL2, CCL5, IFNB1, CXCL3, ANTXR2, STAT2, STAT1, CASP1, NOD1, OAS3</i> |
| hsa04668 | TNF signaling pathway                  | 31    | 8.47            | 4.75E-21 | <i>CXCL2, FAS, ICAM1, CSF1, VCAM1, CASP7, PTGS2, MAP3K5, MAPK8, TNFAIP3, BIRC3, IL1B, CXCL1, BIRC2, IL18R1, MLKL, CCL20, LIF, MAP3K8, CX3CL1, IL6, RIPK1, MMP3, NFKB1, CCL2, CCL5, CXCL5, CXCL3, CXCL10, CFLAR, TRAF1</i>                                            |
| hsa05164 | Influenza A                            | 35    | 5.97            | 2.95E-18 | <i>CXCL8, FAS, ICAM1, TLR3, RSAD2, OAS1, TNFSF10, CIITA, MAPK8, HLA-DOB, TRIM25, MX1, TICAM1, IFNAR2, PML, DDX58, IL1B, EIF2AK2, IRF9, MYD88, NLRP3, OAS2, IL6, NFKB1, CCL2, CCL5, JAK2, IFNB1, CXCL10, IFNGR2, STAT2, CASP1, STAT1, OAS3, IFIH1</i>                 |
| hsa05168 | Herpes simplex infection               | 34    | 5.42            | 2.12E-16 | <i>HLA-F, FAS, SP100, TLR3, OAS1, MAPK8, HLA-DOB, CD74, TICAM1, IFNAR2, PML, TNFSF14, DDX58, IL1B, EIF2AK2, IRF9, MYD88, TRAF1, IFIT1, OAS2, NFKB1, IL6, CCL2, CCL5, JAK2, IFNB1, TAP1, TAP2, IFNGR2, STAT2, C3, STAT1, OAS3, IFIH1</i>                              |
| hsa04064 | NF-kappa B signaling pathway           | 22    | 6.83            | 4.16E-13 | <i>CXCL8, CXCL2, ICAM1, VCAM1, PTGS2, TRIM25, TICAM1, TNFAIP3, TNFSF14, BIRC3, DDX58, IL1B, BIRC2, RELB, MYD88, RIPK1, NFKB1, BCL2A1, CCL4, NFKB2, CFLAR, TRAF1</i>                                                                                                  |
| hsa04060 | Cytokine-cytokine receptor interaction | 36    | 3.93            | 8.02E-13 | <i>CXCL8, IL6R, FLT3, CXCL9, CXCL2, FAS, CSF1, IL15RA, TNFSF10, CXCL11, TNFSF9, IL1RAP, BMP2, IFNAR2, TNFSF14, IL1B, CXCL1, IL18R1, CCL7, CCL20, LIF, CXCL16, CXCL6, CX3CL1, IL6, IL7, CCL2, CCL5, IFNB1, TSLP, CXCL3, CXCL5, CXCL10, CCL4, IFNGR2, PDGFC</i>        |
| hsa04217 | Necroptosis                            | 27    | 4.86            | 5.04E-12 | <i>RBCK1, FAS, STAT4, TLR3, PLA2G4A, TNFSF10, MAPK8, TICAM1, IFNAR2, TNFAIP3, BIRC3, IL1B, EIF2AK2, MLKL, BIRC2, IRF9, NLRP3, PARP4, RIPK1, JAK2, IFNB1, IFNGR2, STAT5A, STAT2, CASP1, STAT1, CFLAR</i>                                                              |
| hsa04657 | IL-17 signaling pathway                | 19    | 6.03            | 1.83E-10 | <i>CXCL8, CXCL2, PTGS2, MMP13, MAPK8, TNFAIP3, IL1B, CXCL1, CCL7, CCL20, CXCL6, TRAF3IP2, IL6, NFKB1, MMP3, CCL2, CXCL5, CXCL3, CXCL10</i>                                                                                                                           |
| hsa05162 | Measles                                | 22    | 4.84            | 5.58E-10 | <i>FAS, OAS1, TNFSF10, MX1, IFNAR2, TNFAIP3, DDX58, IL1B, EIF2AK2, IRF9, MYD88, OAS2, IL6, NFKB1, JAK2, IFNB1, IFNGR2, STAT5A, STAT2, STAT1, OAS3, IFIH1</i>                                                                                                         |
| hsa04620 | TLR signaling pathway                  | 18    | 5.11            | 9.27E-09 | <i>CXCL8, TICAM1, MAP3K8, IL6, RIPK1, NFKB1, IFNAR2, CXCL11, CCL5, IFNB1, MAPK8, IL1B, CXCL9, CXCL10, CCL4, STAT1, MYD88, TLR3</i>                                                                                                                                   |

mRNA, messenger RNA; KEGG, Kyoto Encyclopedia of Genes and Genomes; NLR, NOD-like receptor; TLR, Toll-like receptor.
